# Supplementary material for: Expression of TIPE family members in human colorectal cancer
Source: PubMed Central journal article supplement — Oncol Lett. 2020 Dec 15;21(2):118. doi: 10.3892/ol.2020.12379 (PMC7751461; doi:10.3892/ol.2020.12379), 2020-12-15
Supplement: Supplementary_Data.pdf [file Supplementary_Data.pdf]

Table SI. Ratio of TIPE family mRNA or protein expression in CRC tumor and adjacent tissues.

| TIPE family members | Ratio of T/A         | 1                       | 2                       | 3                       | 4                       | 5                       |
|---------------------|----------------------|-------------------------|-------------------------|-------------------------|-------------------------|-------------------------|
| TNFAIP8             | Protein <sup>a</sup> | 0.72641178 <sup>c</sup> | 1.38779620 <sup>c</sup> | 1.07786547 <sup>c</sup> | 0.92070471              | 1.93555999 <sup>c</sup> |
|                     | mRNA <sup>b</sup>    | 1.49847581 <sup>c</sup> | 0.11912833 <sup>c</sup> | 0.25124807 <sup>c</sup> | 0.35499832              | 0.23684997 <sup>c</sup> |
| TIPE1               | Protein              | 0.95013727              | 0.74911907              | 0.79432475              | 0.66285728              | 0.84166636              |
|                     | mRNA                 | 0.15479341              | 0.32522290              | 0.15208943              | 0.16266171              | 0.64533580              |
| TIPE2               | Protein              | 0.26170242              | 0.71348016              | 0.72998993              | 0.50455735              | 0.72077099              |
|                     | mRNA                 | 0.17216480              | 0.17216480              | 0.31272894              | 0.27671021              | 0.16342268              |
| TIPE3               | Protein              | 1.06590513 <sup>c</sup> | 1.12504259 <sup>c</sup> | 1.21960550 <sup>c</sup> | 1.70104790 <sup>c</sup> | 0.53100020              |
|                     | mRNA                 | 0.12895549 <sup>c</sup> | 0.12110064 <sup>c</sup> | 0.10301535 <sup>c</sup> | 0.21536521 <sup>c</sup> | 0.50392004              |

<sup>a</sup>The ratio of the relative protein expression of TIPE family members in tumor tissues to that in adjacent tissues. <sup>b</sup>The ratio of the relative mRNA expression of TIPE family members in tumor tissues to that in adjacent tissues. Ratio >1 means that the mRNA or protein expression in CRC tissues is higher compared with that in the adjacent tissues. <sup>c</sup>The expression patterns of protein and mRNA in paired samples were inconsistent. CRC, human colorectal cancer; T, tumor tissue; A, adjacent tissue.
